# Supplementary material
Source: MDPI journal article supplement (https://www.mdpi.com/2413-8851/8/2/53)
Supplement: s1 [file s1]

Archive with 1 entries (1 files):
- urbansci-2920348-supplementary.pdf
